# Supplementary material for: A formation model of superoxide radicals photogenerated in nano-TiO2 suspensions
Source: Royal Society of Chemistry journal article supplement (doi:10.1039/c9ra06323d), 2019-01-01
Supplement: c9ra06323d1.pdf [file c9ra06323d1.pdf]

## **A Formation Model of Superoxide Radical Photogenerated in Nano-TiO<sub>2</sub> Suspensions**

Dabin Wang,<sup>a</sup> Lixia Zhao,<sup>\*b</sup> Dean Song,<sup>a</sup> Jun Qiu,<sup>a</sup> Fanyu Kong,<sup>\*a</sup> and Liang-Hong Guo<sup>b</sup>

<sup>a</sup> Laboratory of Quality & Safety Risk Assessment for Tobacco, Ministry of Agriculture, Tobacco Research Institute of Chinese Academy of Agricultural Sciences, Qingdao 266101, China

<sup>b</sup> State Key Laboratory of Environmental Chemistry and Ecotoxicology, Research Center for Eco-Environmental Sciences, Chinese Academy of Sciences, P.O. Box 2871, 18 Shuangqing Road, Beijing 100085, China. E-mail: zlx@rcees.ac.cn; Fax: +86-10-62849685; Tel: +86-10-62849338

## Chemicals and instrumentation

The anatase TiO<sub>2</sub> and 5-amino-2,3-dihydro-1,4-phthalazine-dione (luminol) were purchased from Sigma-Aldrich (St. Louis, MO, USA). The CFCL apparatus for monitoring the formation process of O<sub>2</sub><sup>•-</sup> was custom-built in house and has been previously described in details.<sup>1</sup> In summary, the CFCL apparatus is primarily comprised of a photo reactor, a computer-controlled CL analyzer (Institute of Biophysics, Chinese Academy of Sciences, Beijing, China), and two peristaltic pumps (Longer Precision Pump Co., Baoding, Hebei, China). The photo reactor is a cylindrical quartz container (200 mL) irradiated with a 500 W xenon light source (Trusttech Co., Beijing, China) using a 365 nm filter. The light wavelength used was 365±9 nm. Glass containers were connected to the peristaltic pumps using Tygon pump tubing (i.d.:1 mm). Fluids were pumped into a spiral detection cell in the CL analyzer, and the CL intensity was measured with a photomultiplier tube (PMT). The irradiation intensity was measured by the radiometer. The concentration of DO in TiO<sub>2</sub> suspensions was changed by purging oxygen or nitrogen respectively, and measured by the portable dissolved oxygen meter.

Table S1. CL intensity upon different experimental conditions at different irradiation time.

| Time (s) | TiO <sub>2</sub> concentration (mg/mL) |      |      | Irradiation intensity (mW/cm <sup>2</sup> ) |       |       | DO concentration (mg/mL) |      |       |
|----------|----------------------------------------|------|------|---------------------------------------------|-------|-------|--------------------------|------|-------|
|          | 0.02                                   | 0.05 | 0.10 | 0.3                                         | 1.1   | 2.0   | 2.0                      | 8.0  | 32.0  |
| 300      | 1077                                   | 1609 | 2409 | 2762                                        | 3157  | 3374  | 5274                     | 7385 | 12194 |
| 600      | 1426                                   | 2329 | 3813 | 4009                                        | 5042  | 5692  | 5331                     | 7449 | 12368 |
| 900      | 1709                                   | 2778 | 4744 | 5059                                        | 6485  | 7462  | 5335                     | 7452 | 12378 |
| 1200     | 1937                                   | 3058 | 5361 | 5945                                        | 7589  | 8813  | 5335                     | 7452 | 12379 |
| +∞       | 2905                                   | 3524 | 6575 | 10703                                       | 11187 | 13171 | 5335                     | 7452 | 12379 |



Figure S1. Linear fitting between CL intensity and TiO<sub>2</sub> concentrations at 300s(a), 600s(b),

900s(c), 1200s(d) and  $+\infty$ (e).



Figure S2. Linear fitting between CL intensity and irradiation intensity at 300s(a), 600s(b), 900s(c), 1200s(d) and  $+\infty$ (e).



Figure S3. Linear fitting between CL intensity and DO concentration at 300s(a), 600s(b), 900s(c), 1200s(d) and  $+\infty$ (e).

## Reference

1 D. Wang, L. Zhao, L.-H. Guo, H. Zhang, *Analytical chemistry*, 2014, **86**, 10535-10539.
